# Supplementary material for: Assessment of Clinical Benefit of Integrative Genomic Profiling in Advanced Solid Tumors
Source: PubMed Central journal article supplement (PMC7907987; doi:10.1001/jamaoncol.2020.7987), 2021-02-25
Supplement: jamaoncol-e207987-s003.pdf [file jamaoncol-e207987-s003.pdf]

## Supplementary Online Content

Cobain EF, Wu Y-M, Vats P, et al. Assessment of clinical benefit of integrative genomic profiling in advanced solid tumors. *JAMA Oncol*. Published online February 25, 2021.  
doi:10.1001/jamaoncol.2020.7987

**eFigure 1.** Sample Mi-ONCOSEQ Patient Report

**eFigure 2.** Diverse Metastatic Cancer Types Represented in the MET1000 Cohort and Biopsy Sites

**eFigure 3.** Time on Treatment for Patients With Exceptional Response to Sequencing-Directed Therapy

**eFigure 4.** Baseline and Subsequent Computed Tomography Images From 4 Patients Who Had Exceptional Response to Sequencing-Directed Therapy

**eFigure 5.** Time on Treatment for Patients Receiving Therapy Based on a Pathogenic Germline Variant

**eTable 6.** Detailed Information Regarding Patients With CUP in the MET1000 Cohort

**eTable 7.** Proportion of Patients Receiving Sequencing-Directed Therapy by Year of Enrollment

This supplementary material has been provided by the authors to give readers additional information about their work.

eFigure 1. Sample Mi-ONCOSEQ Patient Report

Patient ID: TP\_2257

**ONCOSEQ INTEGRATIVE SEQUENCING EXECUTIVE REPORT**

**PATIENT INFORMATION**

|                        |                                                                                                                                                                                                                                                                                                                                                                                                                                                                                                                                                                                                                                                                                                                                                                                                                                                                                                                                                                                                                       |                                   |                   |                                    |             |
|------------------------|-----------------------------------------------------------------------------------------------------------------------------------------------------------------------------------------------------------------------------------------------------------------------------------------------------------------------------------------------------------------------------------------------------------------------------------------------------------------------------------------------------------------------------------------------------------------------------------------------------------------------------------------------------------------------------------------------------------------------------------------------------------------------------------------------------------------------------------------------------------------------------------------------------------------------------------------------------------------------------------------------------------------------|-----------------------------------|-------------------|------------------------------------|-------------|
| Name:                  |                                                                                                                                                                                                                                                                                                                                                                                                                                                                                                                                                                                                                                                                                                                                                                                                                                                                                                                                                                                                                       | Age/Gender:                       | 53 y/o male       | DOB:                               | 08-27-1962  |
| Ethnic Background:     | Caucasian                                                                                                                                                                                                                                                                                                                                                                                                                                                                                                                                                                                                                                                                                                                                                                                                                                                                                                                                                                                                             | Medical Record #:                 |                   | PATIENT ID:                        | TP_2257     |
| Submitted Diagnosis:   | Metastatic sarcomatoid carcinoma of unknown primary                                                                                                                                                                                                                                                                                                                                                                                                                                                                                                                                                                                                                                                                                                                                                                                                                                                                                                                                                                   | Submitting Pathologist:           |                   |                                    |             |
| Treating Physician:    |                                                                                                                                                                                                                                                                                                                                                                                                                                                                                                                                                                                                                                                                                                                                                                                                                                                                                                                                                                                                                       | Submitted Specimen Site (tumor):  | Colon and omentum | Submitted Specimen Site (normal):  | Blood       |
| PMTB Date:             | Not in PMTB                                                                                                                                                                                                                                                                                                                                                                                                                                                                                                                                                                                                                                                                                                                                                                                                                                                                                                                                                                                                           | Specimen Type (tumor):            | FFPE, Block A1    | Specimen Type (normal):            | Ambient     |
| Report Date:           | September 2016                                                                                                                                                                                                                                                                                                                                                                                                                                                                                                                                                                                                                                                                                                                                                                                                                                                                                                                                                                                                        | Collection Method (tumor):        | Resection         | Collection Method (normal):        | Blood draw  |
| Molecular Analysis by: |                                                                                                                                                                                                                                                                                                                                                                                                                                                                                                                                                                                                                                                                                                                                                                                                                                                                                                                                                                                                                       | Specimen Collection Date (tumor): | June 2016         | Specimen Collection Date (normal): | August 2016 |
| Relevant history:      | <p>CURRENT TREATMENT: None<br/>                     PAST TREATMENT: None<br/>                     6/2016: Doing well until the beginning of June when he became fatigued. He was still able to go to work and do chores but noticed he'd become wiped out after activities such as mowing the lawn. He described often "not feeling quite right" but had no specific symptom.<br/>                     6/14/2016: Developed acute onset severe abdominal pain. CT scan showed a large mass in the left upper quadrant.<br/>                     6/16/2016: Exploratory surgery found a tumor the size of volleyball in his left upper quadrant as well as a large amount of ascites. The tumor was resected in whole; however, after removal of the primary, there was a residual spot of tumor on his abdominal wall. His pathology report reviewed at U of M was metastatic sarcomatoid carcinoma of unknown primary.<br/>                     7/2016: Tumor FFPE was obtained for MI-Oncoseq Sequencing Study.</p> |                                   |                   |                                    |             |

**SEQUENCING QC REPORT**

|                |                                                                                                                 |                 |                                      |
|----------------|-----------------------------------------------------------------------------------------------------------------|-----------------|--------------------------------------|
| Libraries:     | Tumor and normal OncoSeq exome capture libraries and tumor whole transcriptome capture libraries were analyzed. |                 |                                      |
| Sample Quality | Sequencing Quality                                                                                              | Library Quality | Sample Identity (SNP Fingerprinting) |
| Pass           | Pass                                                                                                            | Pass            | Pass                                 |

**POTENTIALLY ACTIONABLE/INFORMATIVE RESULTS**

| Mutation class                                                  | Gene/Aberration                                                                                                                                    | Potential Therapies/*Clinical Trials (*Contingent on meeting study eligibility criteria)                 |
|-----------------------------------------------------------------|----------------------------------------------------------------------------------------------------------------------------------------------------|----------------------------------------------------------------------------------------------------------|
| Somatic Point Mutations (Total: 57)<br><b>20.1 Mutations/Mb</b> | <b>TP53: p.R342*, LOH</b><br><b>SMARCA4: p.T910M, LOH</b> (compromised ATPase activity)                                                            | High mutation burden: immune checkpoint inhibitors<br>NCT02465060, NCT01876511, NCT02628067, NCT02646748 |
| Somatic Indels (Total: 8)                                       | CDK13 (p.A162fs), GLIS2 (p.G397fs), HDAC2 (p.T459fs), KMT2B (p.G1099fs), PDS5B (p.K1318fs), XIRP2 (p.S470fs), ZFH3 (p.P3419fs), ZNF384 (p.Q453dup) |                                                                                                          |
| Copy Number Aberrations                                         | <b>Aneuploid</b><br><b>Genome-wide uniparental disomy (UPD)</b><br>(See Copy number plot below)                                                    |                                                                                                          |
| Gene Fusions                                                    | No driver fusion detected                                                                                                                          |                                                                                                          |
| Outlier Gene Expression                                         | No notable outliers<br><b>Tumor origin remains unknown</b>                                                                                         |                                                                                                          |
| Germline Variants for Disclosure                                | <b>MSH2: p.Q409fs</b><br>Loss of heterozygosity (LOH) through UPD in tumor                                                                         | Genetic counseling<br>Immunotherapy                                                                      |

**INTERPRETATION OF RESULTS**

- **Aberrations that may relate to standard of care:** N/A
- **Aberrations that may make patient eligible for an open clinical trial or other therapies:**

OncoSeq was developed and its performance characteristics determined by the Michigan Center for Translational Pathology. It has not been cleared or approved by the FDA. The laboratory is regulated under CLIA as qualified to perform high-complexity testing. This test is used for clinical purposes.

**Note:** Clinical sequencing is carried out for patients enrolled on IRB approved protocols (HUM00046018; HUM00067928; HUM00056496).

**CLIA#: 23D0366712 Electronic Signature by:**

Address: 1500 E. Medical Center Drive, Ann Arbor, MI 48109; Email: [MiOncoSeq-Admin@med.umich.edu](mailto:MiOncoSeq-Admin@med.umich.edu); Phone: 734-763-2826; Fax: (734) 647-7827

**Patient ID: TP\_2257**

**MSH2 p.Q409fs germline variant with LOH in tumor:**

NCT02465060: Molecular Analysis for Therapy Choice (MATCH). Subprotocol Z1D (Loss of MLH1 or MSH2 by IHC) - Patients with mismatch repair deficiency (loss of MLH1 or MSH2 by IHC) receive nivolumab.

NCT01876511: Phase 2 study of MK-3475 in patients with Microsatellite Unstable (MSI) Tumors. MK-3475 is a humanized monoclonal antibody against human cell surface receptor PD-1.

NCT02628067: A Clinical Trial of Pembrolizumab (MK-3475) Evaluating Predictive Biomarkers in Subjects with Advanced Solid Tumors (KEYNOTE 158).

NCT02646748: A Platform Study Exploring the Safety, Tolerability, Effect on the Tumor Microenvironment, and Efficacy of Pembrolizumab + INCB Combinations in Advanced Solid Tumors. Condition: MMR-deficient Tumors.

**Germline variants/family history- implications for disclosure:**

**MSH2 p.Q409fs variant, pathogenic**

Analysis of patient's peripheral blood sample identified a pathogenic germline variant in the *MSH2* gene (NM\_000251.2: c.1226\_1227delAG, p.Gln409fs; dbSNP: rs63750086). Mutations of *MSH2* have been previously reported in association with Lynch syndrome (also known as Hereditary Nonpolyposis Colorectal Cancer) (Ref 1-5). Lynch syndrome is an autosomal dominant cancer predisposition syndrome characterized by an increased risk of colorectal cancer and cancers of the endometrium, ovary, stomach, small intestine, hepatobiliary tract, urinary tract, brain, and skin. Screening and surveillance protocols exist which have been proven to decrease morbidity and mortality in Lynch syndrome. Genetic counseling is strongly recommended.

**Other informative results:**

- This tumor is deficient of mismatch repair due to combined germline and somatic inactivation of the *MSH2* gene. The hypermutation phenotype (20.1 Mutations/Mb) and observed mutational signature are consistent with defective DNA mismatch repair.

**References:**

1. Moslein G, Tester DJ, Lindor NM, Honchel R, Cunningham JM, French AJ, Halling KC, Schwab M, Goretzki P, Thibodeau SN. Microsatellite instability and mutation analysis of hMSH2 and hMLH1 in patients with sporadic, familial and hereditary colorectal cancer. *Hum Mol Genet.* 1996, 5(9):1245-52. PMID: 8872463.
2. Mangold E, Pagenstecher C, Friedl W, Mathiak M, Buettner R, Engel C, Loeffler M, Holinski-Feder E, Müller-Koch Y, Keller G, Schackert HK, Krüger S, Goecke T, Moeslein G, Kloor M, Gebert J, Kunstmann E, Schulmann K, Rüschoff J, Propping P. Spectrum and frequencies of mutations in MSH2 and MLH1 identified in 1,721 German families suspected of hereditary nonpolyposis colorectal cancer. *Int J Cancer.* 2005, 116(5):692-702. PMID: 15849733.
3. Tang R, Hsiung C, Wang JY, Lai CH, Chien HT, Chiu LL, Liu CT, Chen HH, Wang HM, Chen SX, Hsieh LL; TCOG HNPCC Consortium. Germ line MLH1 and MSH2 mutations in Taiwanese Lynch syndrome families: characterization of a founder genomic mutation in the MLH1 gene. *Clin Genet.* 2009, 75(4):334-45. PMID: 19419416.
4. Pérez-Cabomero L, Borrás Flores E, Infante Sanz M, Velasco Sampedro E, Acedo Becares A, Lastra Aras E, Cuevas González J, Pineda Riu M, Ramón y Cajal Asensio T, Capellá Munar G, Miner Pino C, Durán Domínguez M. Characterization of new founder Alu-mediated rearrangements in MSH2 gene associated with a Lynch syndrome phenotype. *Cancer Prev Res (Phila).* 2011, 4(10):1546-55. PMID: 21778331.
5. Sehgal R, Sheahan K, O'Connell PR, Hanly AM, Martin ST, Winter DC. Lynch syndrome: an updated review. *Genes (Basel).* 2014, 5(3):497-507. PMID: 24978665.

**Copy number and gene expression plots:**

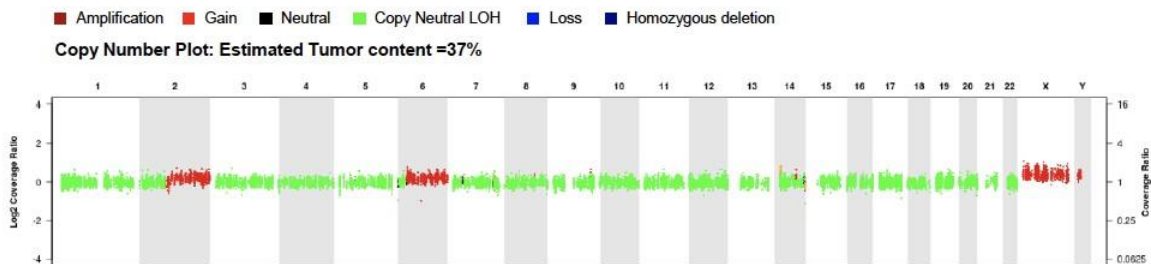

OncoSeq was developed and its performance characteristics determined by the Michigan Center for Translational Pathology. It has not been cleared or approved by the FDA. The laboratory is regulated under CLIA as qualified to perform high-complexity testing. This test is used for clinical purposes.

**Note:** Clinical sequencing is carried out for patients enrolled on IRB approved protocols (HUM00046018; HUM00067928; HUM00056496).

**CLIA#: 23D0366712 Electronic Signature by:**

Address: 1500 E. Medical Center Drive, Ann Arbor, MI 48109; Email: [MiOncoSeq-Admin@med.umich.edu](mailto:MiOncoSeq-Admin@med.umich.edu); Phone: 734-763-2826; Fax: (734) 647-7827

- **Supplementary Tables:**

Summary of somatic mutations

| Gene   | Location (GRCh37) | Variant                               | Allelic Fraction |
|--------|-------------------|---------------------------------------|------------------|
| AATK   | chr17:79095670    | NM_004920.2: c.1757G>A, p.Gly586Asp   | 39%              |
| ADGRL3 | chr4:62812686     | NM_015236.5: c.2270C>T, p.Thr757Met   | 32%              |
| ARID1B | chr6:157528436    | NM_017519.2: c.6122A>G, p.His2041Arg  | 45%              |
| ATAD2  | chr8:124338173    | NM_014109.3: c.3962A>G, p.Gln1321Arg  | 21%              |
| CD79B  | chr17:62007182    | NM_000626.3: c.497C>T, p.Thr166Met    | 36%              |
| CDK13  | chr7:39990716     | NM_003718.4: c.484delG, p.Ala162fs    | 21%              |
| EGR1   | chr5:137803117    | NM_001964.2: c.979C>T, p.Arg327Trp    | 40%              |
| ETV7   | chr6:36343801     | NM_016135.3: c.154G>A, p.Ala52Thr     | 44%              |
| EXT2   | chr11:44228435    | NM_000401.3: c.1687G>A, p.Glu563Lys   | 5%               |
| FAT2   | chr5:150923969    | NM_001447.2: c.6719T>C, p.Val2240Ala  | 6%               |
| FAT4   | chr4:126408584    | NM_024582.4: c.12901G>A, p.Asp4301Asn | 19%              |
| FAT4   | chr4:126411664    | NM_024582.4: c.13687C>G, p.Pro4563Ala | 13%              |
| FBXW7  | chr4:153249457    | NM_033632.3: c.1321C>T, p.Arg441Trp   | 37%              |
| FGF12  | chr3:191888259    | NM_004113.5: c.415A>G, p.Lys139Glu    | 3%               |
| FGFR3  | chr4:1804668      | NM_001163213.1: c.958G>A, p.Asp320Asn | 35%              |
| FOS    | chr14:75748111    | NM_005252.3: c.1127C>T, p.Thr376Met   | 22%              |
| GLIS2  | chr16:4387132     | NM_032575.2: c.1190delG, p.Gly397fs   | 42%              |
| HDAC2  | chr6:114264517    | NM_001527.3: c.1375delA, p.Thr459fs   | 14%              |
| HDAC4  | chr2:240024583    | NM_006037.3: c.2107G>A, p.Gly703Arg   | 49%              |
| KDM2B  | chr12:121987375   | NM_032590.4: c.566G>A, p.Arg189His    | 33%              |
| KMT2A  | chr11:118376815   | NM_005933.3: c.10199C>T, p.Pro3400Leu | 39%              |
| KMT2B  | chr19:36214865    | NM_014727.2: c.3296delG, p.Gly1099fs  | 19%              |
| KMT5C  | chr19:55855127    | NM_032701.3: c.466G>A, p.Gly156Ser    | 37%              |
| LYN    | chr8:56866474     | NM_002350.3: c.721G>T, p.Glu241*      | 36%              |
| MAST2  | chr1:46500323     | NM_015112.2: c.3982C>T, p.Arg1328Cys  | 40%              |
| MBD1   | chr18:47806311    | NM_002384.2: c.52C>T, p.Arg18Cys      | 35%              |
| NEK11  | chr3:130947408    | NM_024800.4: c.1436A>G, p.Tyr479Cys   | 21%              |
| NEK8   | chr17:27068442    | NM_178170.2: c.1903T>C, p.Tyr635His   | 20%              |
| NOTCH1 | chr9:139399976    | NM_017617.4: c.4372G>A, p.Ala1458Thr  | 36%              |
| NR3C2  | chr4:149041372    | NM_000901.4: c.2578G>A, p.Val860Ile   | 41%              |
| PBRM1  | chr3:52696241     | NM_018313.4: c.436C>T, p.Arg146*      | 38%              |
| PDS5B  | chr13:33344579    | NM_015032.3: c.3954delA, p.Lys1318fs  | 18%              |
| PHF8   | chrX:54011458     | NM_015107.2: c.2332C>T, p.Arg778Trp   | 56%              |
| PIK3R2 | chr19:18273884    | NM_005027.3: c.1217G>A, p.Arg406His   | 35%              |
| PKHD1  | chr6:51613046     | NM_138694.3: c.9368C>T, p.Ala3123Val  | 44%              |
| PKP2   | chr12:32974415    | NM_004572.3: c.2020G>A, p.Val674Met   | 36%              |
| PRDM15 | chr21:43277389    | NM_022115.4: c.1279G>A, p.Glu427Lys   | 33%              |
| PRKACB | chr1:84647916     | NM_002731.3: c.142A>G, p.Lys48Glu     | 37%              |
| PRKDC  | chr8:48805713     | NM_006904.6: c.3833G>A, p.Arg1278His  | 34%              |
| PRSS1  | chr7:142459627    | NM_002769.4: c.203G>A, p.Arg68His     | 35%              |
| PTGS1  | chr9:125148757    | NM_000962.3: c.1042G>A, p.Val348Met   | 33%              |
| PTPRJ  | chr11:48166643    | NM_002843.3: c.2878T>C, p.Tyr960His   | 6%               |
| RET    | chr10:43612149    | NM_020630.4: c.2254T>C, p.Tyr752His   | 10%              |
| SAV1   | chr14:51111571    | NM_021818.3: c.697C>T, p.Arg233*      | 42%              |

**OncoSeq** was developed and its performance characteristics determined by the Michigan Center for Translational Pathology. It has not been cleared or approved by the FDA. The laboratory is regulated under CLIA as qualified to perform high-complexity testing. This test is used for clinical purposes.

**Note:** Clinical sequencing is carried out for patients enrolled on IRB approved protocols (HUM00046018; HUM00067928; HUM00056496).

**CLIA#: 23D0366712 Electronic Signature by:**

Address: 1500 E. Medical Center Drive, Ann Arbor, MI 48109; Email: [MiOncoSeq-Admin@med.umich.edu](mailto:MiOncoSeq-Admin@med.umich.edu); Phone: 734-763-2826; Fax: (734) 647-7827

All patients participating in Mi-ONCOSEQ had summary of clinically actionable genomic alterations summarized in the report format above, highlighting somatic point mutations (including tumor mutational burden), somatic indels, copy- number alterations, gene fusions, genes with outlier expression, and pathogenic germline variants for disclosure. Cases presented at precision medicine tumor board (PMTB) met one of the following criteria: 1) highly clinically actionable alteration for which sequencing-directed therapy (SDT) could be considered, 2) change in cancer diagnosis, or 3) rare or unexpected NGS finding of significant clinical or scientific interest. The PMTB included pediatric and adult oncologists, geneticists, pathologists, biologists, bioinformaticians, bioethicists, genetic counselors, study coordinators, and ad hoc expertise.

**eFigure 2.** Diverse Metastatic Cancer Types Represented in the MET1000 Cohort and Biopsy Sites

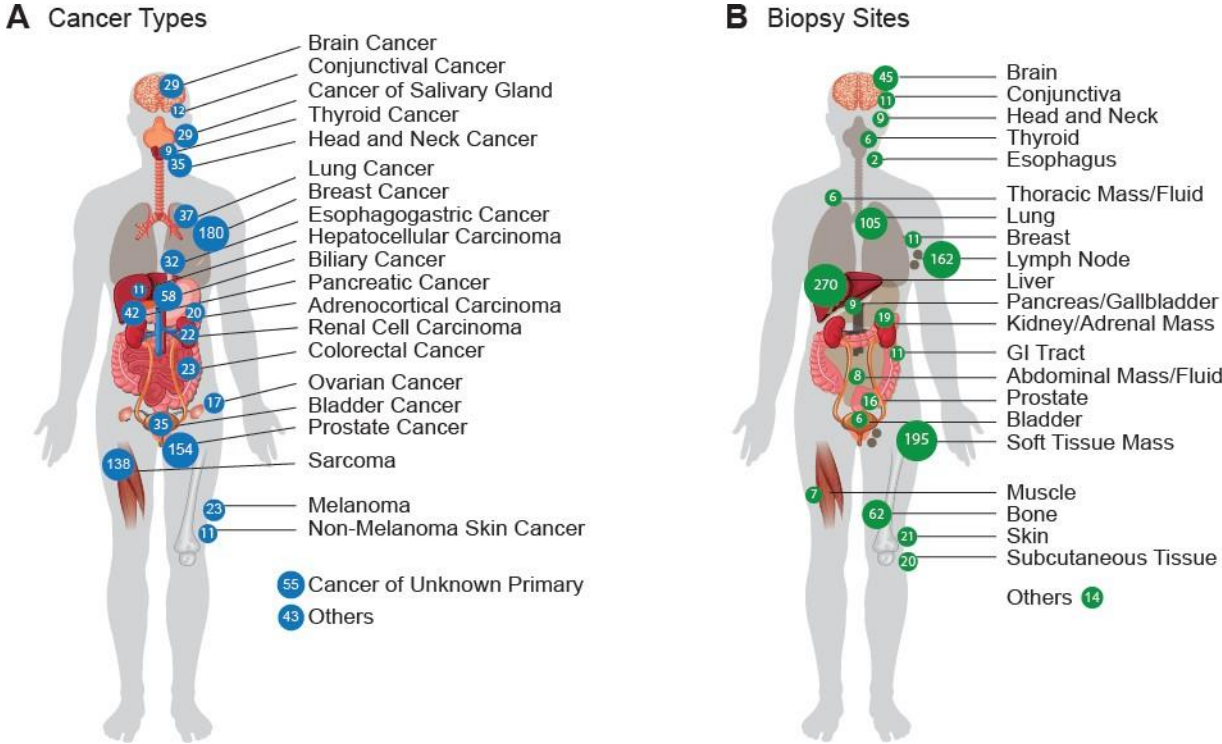

A. Number of each cancer type sequenced in the study.  
 B. Number of metastatic biopsies by site.

**eFigure 3.** Time on Treatment for Patients With Exceptional Response to Sequencing-Directed Therapy

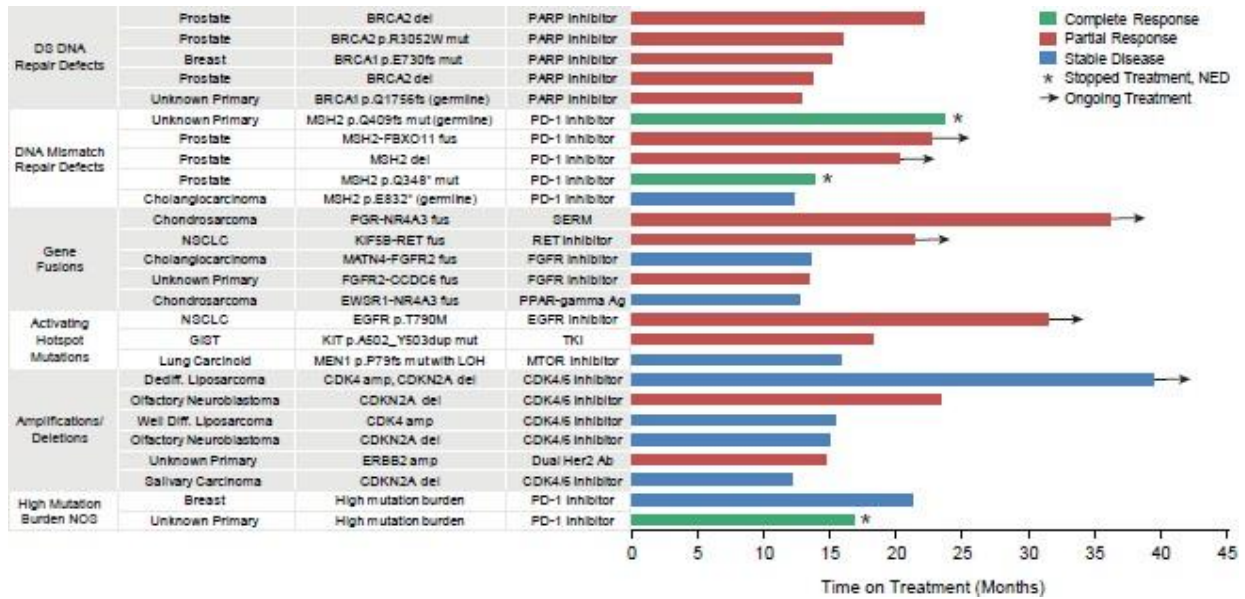

Patients are classified by disease type, clinically actionable genomic alteration, sequencing-directed therapy administered, and best response to therapy. Three patients had complete response which is ongoing despite cessation of therapy; NED, no evidence of disease. Six patients were receiving ongoing treatment at the time of data analysis. NSCLC, non-small cell lung cancer; GIST, gastrointestinal stromal tumor; mut, mutation; del, deletion; fs, frameshift; fus, fusion; LOH, loss of heterozygosity; amp, amplification; SERM, selective estrogen receptor modulator; TKI, tyrosine kinase inhibitor.

**eFigure 4.** Baseline and Subsequent Computed Tomography Images From 4 Patients Who Had Exceptional Response to Sequencing-Directed Therapy

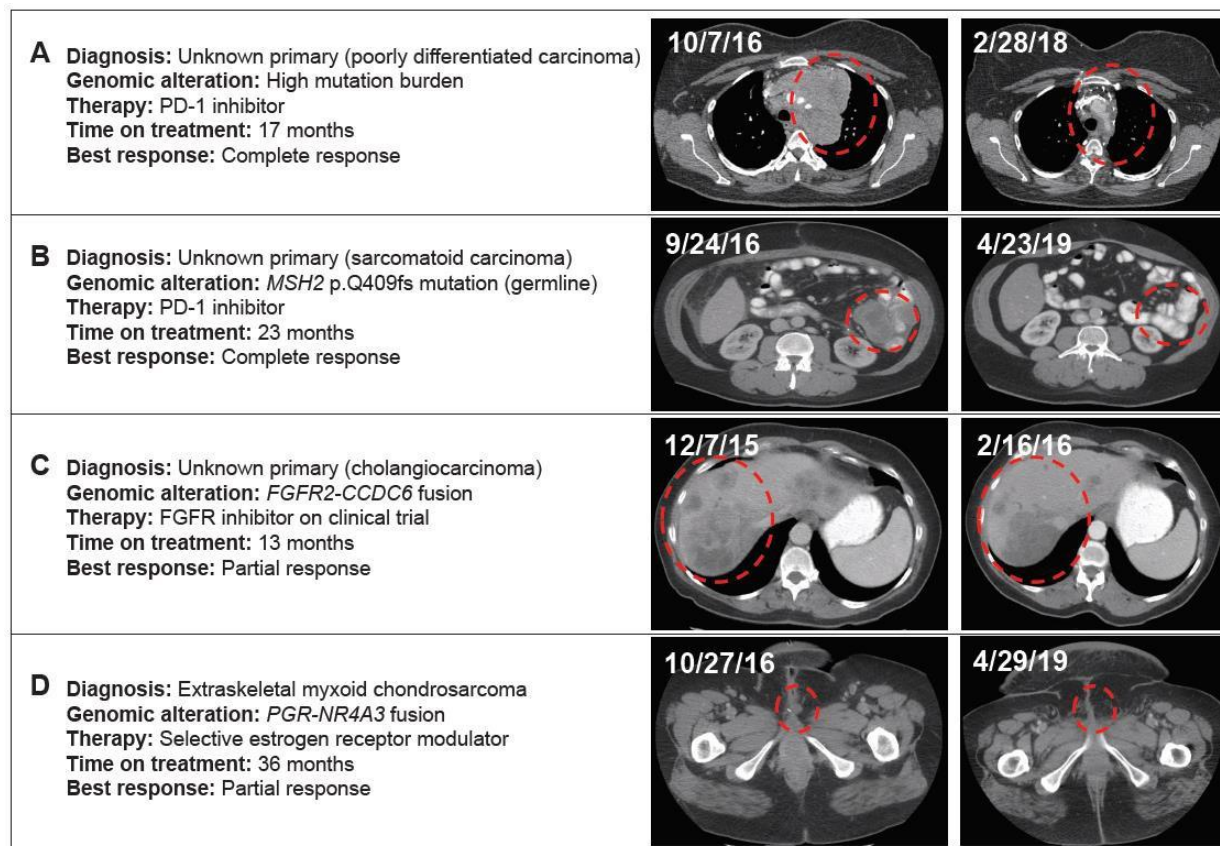

**A.** Patient with mediastinal mass of unknown primary origin (poorly differentiated carcinoma) diagnosed in July 2016 with high tumor mutation burden identified on genomic profiling who had exceptional response to single-agent PD-1 inhibitor therapy. The patient discontinued PD-1 inhibitor after 17 months due to complete response. **B.** Patient with sarcomatoid carcinoma of unknown origin (left upper quadrant abdominal mass) identified on genomic profiling to have a PGV in *MSH2* who had exceptional response to single-agent PD-1 inhibitor therapy. The patient discontinued PD-1 inhibitor therapy after 23 months due to complete response. **C.** Patient with unknown primary cancer involving liver, bone, and lung identified on genomic profiling to have cholangiocarcinoma with *FGFR2-CCDC6* fusion who had exceptional response to FGFR inhibitor administered on clinical trial lasting 13 months. **D.** Patient with extraskeletal myxoid chondrosarcoma involving bilateral inguinal regions with lung metastases, diagnosed during pregnancy. Genomic profiling identified a gene fusion involving the progesterone receptor (*PGR-NR4A3*) for which a selective estrogen receptor modulator was prescribed. Patient had partial response (near complete response) lasting 36 months which is ongoing.



**eFigure 5.** Time on Treatment for Patients Receiving Therapy Based on a Pathogenic Germline Variant

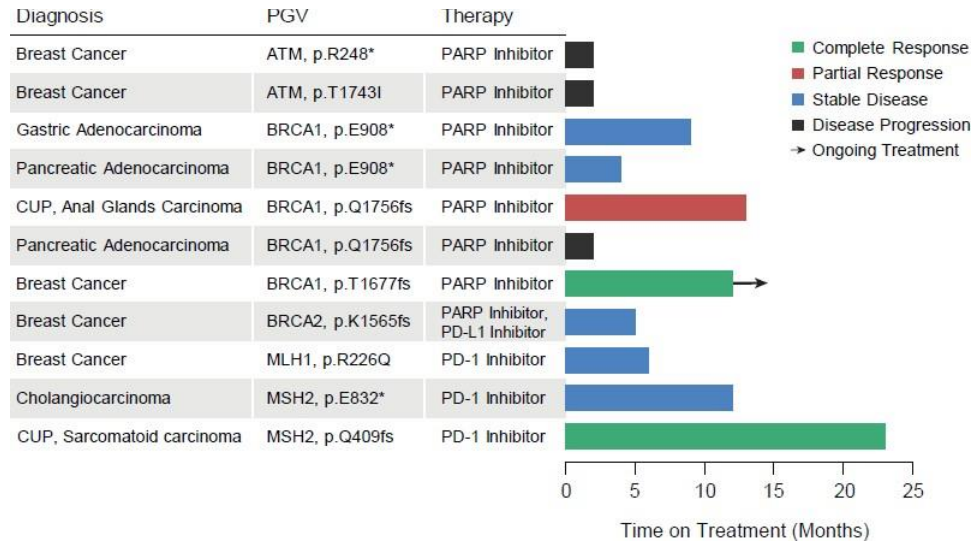

Eleven patients with clinical follow up received subsequent therapy on the basis of a pathogenic germline variant (PGV) identified, 10 of which were discovered by Mi-ONCOSEQ testing (one patient was previously known to have a PGV in *BRCA1*). Six patients achieved clinical benefit (time on treatment  $\geq$  six months). One patient receiving a PARP inhibitor for a PGV in DNA repair and one patient receiving an immune checkpoint inhibitor for a PGV identified in mismatch repair achieved complete responses. Arrow indicates ongoing therapy. For two patients with cancer of unknown primary (CUP), one was reclassified following sequencing as an anal glands carcinoma and the other was best classified following sequencing as a sarcomatoid carcinoma. fs, frameshift; \* indicates nonsense mutation (resulting in stop codon).

*Please see corresponding Excel spreadsheets for eTables 1-5*

### **eTable 1. Gene List of the Mi-ONCOSEQ Targeted Panel**

List of 1,700 genes included in the OncoSeq targeted panel with those genes reported as pathogenic germline variants (PGVs) designated when identified in both tumor and normal samples.

### **eTable 2. MET1000 Cohort Demographics and Sequencing Information**

Case information including age, gender, biopsy site, type of tissue sequenced (frozen or formalin-fixed paraffin embedded (FFPE)), cancer diagnosis prior to Mi-ONCOSEQ enrollment, cancer diagnosis post-sequencing, primary tumor site, time elapsed between cancer diagnosis and enrollment in Mi-ONCOSEQ study, receipt of systemic therapy prior to Mi-ONCOSEQ enrollment, next-generation sequencing platform (whole-exome sequencing (WES) or targeted panel (OncoSeq)), tumor exome, normal exome, capture transcriptome and polyA libraries and designation of cases presented at precision medicine tumor board (PMTB). M, male; F, female; Y, yes; N, no; Mo, months.

### **eTable 3. Informative Molecular Events Identified in the MET1000 Cohort**

Table indicates cancer type, gene of interest, chromosomal location, and type of informative molecular event. Corresponding loss of heterozygosity (LOH) events are also noted. The clinical tier for each molecular event is also indicated. Mut, Mutation; Del, homozygous deletion; Amp, amplification; Germ, germline; Fus, gene fusion; Exp, expression concordant with gene amplification; Dx, markers for cancer of unknown primary origin or change of diagnosis; Virus, viral pathogen.

### **eTable 4. Detailed Treatment Information for Patients in MET1000 Cohort Receiving Sequencing-Directed Therapy**

eTable indicates date of enrollment, cancer type, actionable molecular alteration identified, and type of sequencing-directed therapy (SDT) administered, including whether or not therapy was administered on clinical trial (T), off-label (O), or on-label (L). Also noted is the duration of time patients were treated with SDT and best clinical response including progressive disease (PD), stable disease (SD), partial response (PR), complete response, or not applicable (N/A). Also included is the date of patient death or enrollment in hospice (if known) as well as duration of time between patient receipt of SDT and death or hospice enrollment.

### **eTable 5. Detailed Information Regarding Pathogenic Germline Variants Identified in the MET1000 Cohort**

Table summarizes the cancer type in which PGV was identified, gene of interest, specific chromosomal location of PGV, corresponding protein change, and link to entry in ClinVar database. Also denoted is PGV clinical tiering information, with Tier 1 corresponding to PGVs associated with highly penetrant cancer predisposition syndromes, Tier 2 corresponding to PGVs associated with moderately penetrant cancer predisposition syndromes, Tier 3a corresponding to a carrier status which may be associated with increased risk of cancer or a lymphoproliferative disorder in a homozygous state, and Tier 3b corresponding to carrier status with no known cancer risk at present. Presence of a loss of heterozygosity (LOH) and whether or not the PGV was known prior to the patient's enrollment in the Mi-ONCOSEQ study is also indicated.

**eTable 6.** Detailed Information Regarding Patients With CUP in the MET1000 Cohort

| CASE    | DIAGNOSIS AT ENROLLMENT                            | DIAGNOSIS AFTER SEQUENCING         | # OF PRIOR LINES OF THERAPY | SITES OF DISEASE                                 |
|---------|----------------------------------------------------|------------------------------------|-----------------------------|--------------------------------------------------|
| MO_1075 | CUP, Poorly differentiated carcinoma               | CUP                                | 1                           | mediastinal mass, bone                           |
| MO_1086 | CUP                                                | CUP                                | 1                           | lung, bone, lymph node                           |
| MO_1092 | CUP                                                | CUP                                | 3                           | lung, lymph node                                 |
| MO_1123 | CUP, Mucinous adenocarcinoma unknown primary       | Pancreatic Cancer                  | 0                           | pancreas, lung                                   |
| MO_1141 | CUP, SCC                                           | CUP                                | 1                           | lymph node, bone                                 |
| MO_1175 | CUP                                                | Pancreatic Cancer                  | 3                           | liver                                            |
| MO_1197 | CUP, SCC of unknown primary                        | CUP                                | 2                           | lymph node                                       |
| MO_1217 | CUP, Undifferentiated Malignant Neoplasm           | CUP                                | 0                           | lymph node                                       |
| MO_1223 | CUP, Squamous cell carcinoma, NOS                  | CUP                                | 0                           | lymph node                                       |
| MO_1274 | CUP                                                | CUP                                | 1                           | liver                                            |
| MO_1284 | CUP, Adenocarcinoma, Favor Lung primary            | Lung Cancer                        | 0                           | lung, liver, lymph node                          |
| MO_1285 | CUP                                                | Lung Cancer                        | 0                           | lung, lymph node, bone                           |
| MO_1342 | CUP                                                | Esophageal Carcinoma               | 0                           | mediastinal mass, bone                           |
| MO_1363 | CUP, Poorly differentiated carcinoma, NOS          | CUP                                | 1                           | lymph node                                       |
| MO_1379 | CUP                                                | Ovarian Cancer                     | 2                           | lung, lymph node, liver, pelvis                  |
| MO_1383 | CUP                                                | CUP                                | 0                           | liver, lung                                      |
| MO_1407 | CUP                                                | Renal Cell Carcinoma               | 2                           | lung, bone                                       |
| MO_1419 | CUP                                                | CUP                                | 2                           | lymph node, liver, mesentery                     |
| MO_1428 | CUP                                                | Cholangiocarcinoma                 | 1                           | liver, lymph nodes                               |
| MO_1458 | CUP                                                | Serous Ovarian Cancer              | 0                           | peritoneal carcinomatosis with malignant ascites |
| MO_1518 | CUP                                                | Cholangiocarcinoma                 | 0                           | liver, lung, bone                                |
| MO_1542 | CUP                                                | Lung Adenocarcinoma                | 0                           | lymph node                                       |
| MO_1563 | CUP, SCC of unknown primary                        | CUP                                | 0                           | pancreas, liver, spleen, omentum, peritoneum     |
| MO_1597 | CUP                                                | Intrahepatic Cholangiocarcinoma    | 0                           | liver                                            |
| MO_1611 | CUP                                                | CUP                                | 0                           | lymph node, brain                                |
| MO_1634 | CUP, SCC of unknown primary                        | Likely Head and Neck SCC           | 0                           | liver, bone                                      |
| MO_1638 | CUP                                                | Lung Adenocarcinoma                | 1                           | lymph node                                       |
| MO_1648 | CUP                                                | Breast Cancer                      | 0                           | lymph node                                       |
| MO_1677 | CUP, Undifferentiated carcinoma of unknown primary | CUP                                | 3                           | lung, peritoneum, pelvis                         |
| MO_1682 | CUP                                                | Cervical Squamous Cell Carcinoma   | 0                           | lymph node                                       |
| MO_1692 | CUP                                                | Undifferentiated Gastric Carcinoma | 0                           | malignant ascites                                |
| MO_1704 | CUP                                                | CUP                                | 1                           | mediastinal mass, lymph node                     |
| MO_1783 | CUP                                                | Peritoneal Mesothelioma            | 0                           | liver, peritoneum                                |
| MO_1816 | CUP                                                | CUP                                | 0                           | omentum, malignant ascites                       |
| MO_1847 | CUP                                                | Hepatocellular Carcinoma           | 0                           | liver, lymph node                                |
| MO_1897 | CUP, Poorly differentiated malignant neoplasm      | Amelanotic Melanoma                | 0                           | liver                                            |

|         |                                                      |                                         |   |                                                 |
|---------|------------------------------------------------------|-----------------------------------------|---|-------------------------------------------------|
| MO_2020 | CUP, Poorly differentiated malignant neoplasm        | CUP                                     | 0 | liver, lymph node                               |
| MO_2026 | CUP                                                  | Epithelioid Type Angiomyolipoma         | 0 | kidney                                          |
| MO_2050 | CUP                                                  | Bladder Urothelial Carcinoma            | 0 | pelvis, bone                                    |
| MO_2078 | CUP, Well differentiated neuroendocrine neoplasm     | CUP                                     | 3 | liver, bone                                     |
| TP_2002 | CUP                                                  | Breast Cancer                           | 1 | liver, omentum, malignant ascites, pleura       |
| TP_2290 | CUP                                                  | CUP                                     | 0 | colon, lung, adrenal                            |
| TP_2311 | CUP                                                  | CUP                                     | 0 | adrenal                                         |
| TP_2319 | CUP                                                  | Colon Signet Ring Cell Adenocarcinoma   | 1 | omentum, peritoneum                             |
| TP_2329 | CUP, Mesenchymal undifferentiated round cell sarcoma | Solitary fibrous tumor (SFT)            | 0 | kidney                                          |
| TP_2423 | CUP, SCC of unknown primary                          | CUP                                     | 0 | diaphragmatic mass, pre-cardiac mass            |
| TP_2450 | CUP                                                  | CUP (No RNA lib)                        | 0 | liver                                           |
| TP_2491 | CUP                                                  | Male Breast Carcinoma (Triple Negative) | 0 | submental mass, lymph node, bone                |
| TP_2500 | CUP                                                  | CUP                                     | 0 | lymph node, bone, lung                          |
| TP_2526 | CUP                                                  | Endometrial Endometrioid Adenocarcinoma | 4 | lymph node, retroperitoneum, bone, liver, brain |
| MO_1507 | CUP, small cell neuroendocrine                       | CUP                                     | 1 | liver, lymph node, pleura                       |
| MO_1708 | CUP, Adenocarcinoma                                  | Perianal adenocarcinoma                 | 0 | lymph node                                      |
| TP_2180 | CUP                                                  | CUP                                     | 4 | lymph node, skin                                |
| TP_2257 | CUP, Sarcomatoid carcinoma                           | CUP                                     | 0 | intra-abdominal mass                            |
| TP_2417 | CUP, Neuroendocrine                                  | CUP                                     | 2 | liver                                           |

#### CHANGE OF DIAGNOSIS

| CASE    | DIAGNOSIS AT ENROLLMENT         | DIAGNOSIS AFTER SEQUENCING |
|---------|---------------------------------|----------------------------|
| MO_1288 | Breast cancer                   | Ovarian Cancer             |
| MO_1774 | Rhabdomyosarcoma                | Renal Cell Carcinoma       |
| MO_2057 | Pancreatic Neuroendocrine Tumor | Cholangiocarcinoma         |
| TP_2448 | Synovial Cell Sarcoma           | Solitary Fibrous Tumor     |

Table summarizes those patients who entered Mi-ONCOSEQ with diagnosis of cancer of unknown primary (CUP) origin and post-sequencing diagnosis. Also included are four patients that entered Mi-ONCOSEQ with a presumed known tissue of origin, where diagnosis was subsequently changed post-sequencing. For all patients with CUP, number of lines of systemic therapy prior to Mi-ONCOSEQ enrollment and sites of disease are indicated.

**eTable 7.** Proportion of Patients Receiving Sequencing-Directed Therapy by Year of Enrollment

| Year of Enrollment | Total Patients Enrolled | Number Initiating SDT<br>(% of Total Patients Enrolled) |
|--------------------|-------------------------|---------------------------------------------------------|
| 2012               | 79                      | 7 (8.9%)                                                |
| 2013               | 137                     | 5 (3.6%)                                                |
| 2014               | 144                     | 15 (10.4%)                                              |
| 2015               | 140                     | 10 (7.1%)                                               |
| 2016               | 199                     | 46 (23.1%)                                              |
| 2017               | 265                     | 42 (15.8%)                                              |
| 2018               | 38                      | 6 (15.8%)                                               |

Increases in proportion of patients receiving sequencing-directed therapy (SDT) in years 2016-2018 corresponded with increased availability of clinical trials (ASCO TAPUR, NCI MATCH) enrolling on the basis of the presence of a genomic biomarker.
